# Supplementary material for: Crosstalk between Extracellular Matrix Stiffness and ROS Drives Endometrial Repair via the HIF-1α/YAP Axis during Menstruation
Source: MDPI journal article supplement (doi:10.3390/cells11193162), 2022-10-09
Supplement: s1 [file s1]

# **Crosstalk between ECM stiffness and ROS drives endometrial repair via HIF-1 $\alpha$ /YAP axis during menstruation**

Tao Zhang<sup>\*1,2</sup>, Yan Wang<sup>1</sup>, Cuiyan Liu<sup>1</sup>, Chunyang Han<sup>1</sup>

<sup>1</sup> College of Animal Science and Technology, Anhui Agricultural University, Hefei 230031, People's Republic of China.

<sup>2</sup> Department of Clinical Veterinary Medicine, College of Veterinary Medicine, Huazhong Agricultural University, Wuhan 430070, People's Republic of China.

## **\* Correspondence**

Tao Zhang, College of Animal Science and Technology, Anhui Agricultural University, Hefei 230031, People's Republic of China.

**E-mail:** [taozhang@ahau.edu.cn](mailto:taozhang@ahau.edu.cn)

## **Contents**

Supplement Table S1- S2

**Table S1. Information on antibodies used in the study.**

| <b>Antibodies</b>    | <b>Product code</b> | <b>Dilution</b>         | <b>Species</b> | <b>Manufacturer</b>       |
|----------------------|---------------------|-------------------------|----------------|---------------------------|
| GAPDH                | #5174               | 1:1000 (WB)             | Rabbit         | Cell Signaling Technology |
| Anti-rabbit IgG      | #5127               | 1:2000 (WB)             | mouse          | Cell Signaling Technology |
| Anti-mouse IgG       | #7056               | 1:2000 (WB)             | Goat           | Cell Signaling Technology |
| YAP                  | #14074              | 1:1000 (WB), 1:250 (IF) | Rabbit         | Cell Signaling Technology |
| pYAP                 | #13008              | 1:1000 (WB)             | Rabbit         | Cell Signaling Technology |
| FAK                  | #3285               | 1:1000 (WB)             | Rabbit         | Cell Signaling Technology |
| pFAK                 | #3281               | 1:1000 (WB)             | Rabbit         | Cell Signaling Technology |
| pMLC2                | #3671               | 1:1000 (WB)             | Rabbit         | Cell Signaling Technology |
| MLC2                 | #3672               | 1:1000 (WB)             | Rabbit         | Cell Signaling Technology |
| HIF-1 $\alpha$       | #36169              | 1:1000 (WB)             | Rabbit         | Cell Signaling Technology |
| Vinculin             | A14193              | 1:50 (IF)               | Rabbit         | Abclonal                  |
| Brdu                 | A1482               | 1:200(IF)               | mouse          | Abclonal                  |
| Ki67                 | ab15580             | 1:100 (IF)              | Rabbit         | abcam                     |
| Lamin B1             | ab133741            | 1:5000(WB)              | Rabbit         | abcam                     |
| VEGF-A               | AF5131              | 1:1000 (WB)             | Rabbit         | Affinity                  |
| CXCR4                | AF5279              | 1:1000 (WB)             | Rabbit         | Affinity                  |
| P21                  | AF6290              | 1:1000 (WB)             | Rabbit         | Affinity                  |
| CDK4                 | DF6102              | 1:1000 (WB)             | Rabbit         | Affinity                  |
| Cyclin D1            | AF0931              | 1:1000 (WB)             | Rabbit         | Affinity                  |
| Myosin IIC           | DF4196              | 1:500 (WB)              | mouse          | Affinity                  |
| YAP                  | sc-376830           | 1:1000 (WB), 1:50 (IF)  | mouse          | Santa Cruz Biotechnology  |
| Cy3 anti-rabbit IgG  | GB21303             | 1:100 (IF)              | Goat           | Servicebio                |
| Cy3 anti-mouse IgG   | GB21301             | 1:100 (IF)              | Goat           | Servicebio                |
| FITC anti-mouse IgG  | GB22301             | 1:50 (IF)               | Goat           | Servicebio                |
| FITC anti-rabbit IgG | GB22303             | 1:50 (IF)               | Goat           | Servicebio                |
| FITC Phalloidin      | G1028               | 1:200 (IF)              |                | Servicebio                |
| TRITC Phalloidin     | G1041               | 1:200 (IF)              |                | Servicebio                |

**Table S2 oligonucleotide primers used for qPCR.**

| <b>Gene</b> | <b>Forward</b>           | <b>Reverse</b>          |
|-------------|--------------------------|-------------------------|
| YAP         | GCGGTTGAAACAACAGGAATTA   | TGAGACATCCCAGGAGAAGA    |
| VEGF        | ACATTGGCTCACTTCCAGAAACAC | GGTTGGAACCGGCATCTTTATC  |
| Ang-2       | TCCAAGAGCTCGGTTGCTAT     | CCATCTTCTCGGTGTTGGAT    |
| CXCR4       | TGGAACCGATCAGTGTGAGT     | GGCAGGAAGATCCTATTGA     |
| CDK4        | ATGGCTGCCACTCGATATGAA    | TCCTCCATTAGGAACTCTCACAC |
| Cyclin D1   | GCGTACCCTGACACCAATCTC    | CTCCTCTTCGCACTTCTGCTC   |
| p21         | CCTGGTGATGTCCGACCTG      | CCATGAGCGCATCGCAATC     |
| CYR61       | AGCCTCGCATCCTATAACAACC   | TTCTTTCACAAGGCGGCACTC   |
| CTGF        | CCAATGACAACGCCTCCTG      | TGGTGCAGCCAGAAAGCTC     |
| GAPDH       | CCATGTTCGTCATGGGTGTG     | CAGGGGTGCTAAGCAGTTGG    |
